# Supplementary material
Source: Springer Nature journal article supplement (https://www.springermedizin.de/resource/supplementary/12889_2006_553_MOESM3_ESM.pdf/9501142)

SBP (mmHg)  
at discharge

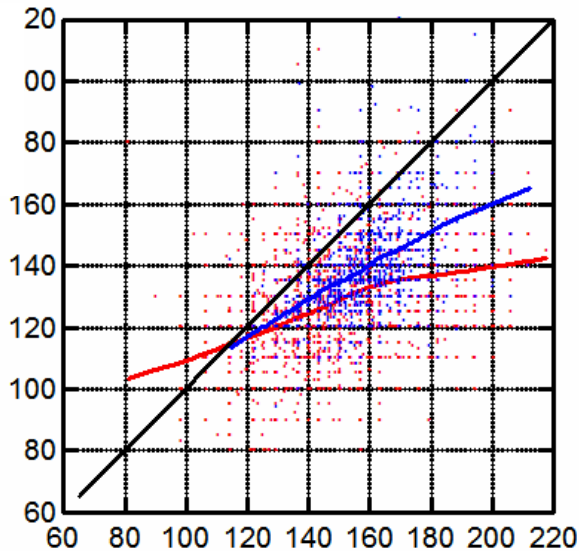

SBP (mmHg)  
on admission

Supplement: MOESM3 [file 9501142]
